# Supplementary material for: The language of vaccination campaigns during COVID-19
Source: HighWire-hosted journal article supplement (doi:10.1136/medhum-2022-012583), 2023-04-06
Supplement: medhum-2022-012583supp001_data_supplement.pdf [file medhum-2022-012583supp001_data_supplement.pdf]

## Appendix 1 – Survey questions considered

| Survey question                                                                                                                                                                                                                                                                                                           | Available responses                                                                                                                                                                                                                                                                                                                                                                                                                                                                                                                                   |
|---------------------------------------------------------------------------------------------------------------------------------------------------------------------------------------------------------------------------------------------------------------------------------------------------------------------------|-------------------------------------------------------------------------------------------------------------------------------------------------------------------------------------------------------------------------------------------------------------------------------------------------------------------------------------------------------------------------------------------------------------------------------------------------------------------------------------------------------------------------------------------------------|
| <p>A. Have you received a COVID-19 vaccine?</p>                                                                                                                                                                                                                                                                           | <ol style="list-style-type: none"> <li>1. Yes - 1 dose</li> <li>2. Yes - 2 doses</li> <li>3. Yes - 3 doses or more (including a booster dose)</li> <li>4. No - I have been offered the COVID-19 vaccine, but I have not had it</li> <li>5. No - I have not received a COVID-19 vaccine nor been invited to have one</li> <li>6. Prefer not to say</li> </ol>                                                                                                                                                                                          |
| <p>B. Which of the following best describes why you have only had one dose of/only had two doses of/not yet had the COVID-19 vaccine?<br/><i>Please select all that apply.</i></p> <p>Base: All adults who have not had the COVID-19 vaccine or have had fewer than three doses, despite being invited (QA=1, 2 or 4)</p> | <ol style="list-style-type: none"> <li>1. I am worried about side effects of the vaccine</li> <li>2. I am medically exempt</li> <li>3. I don't trust the intentions behind wanting to vaccinate the public against COVID-19</li> <li>4. I don't think the vaccine is effective / don't think it works</li> <li>5. I don't think the COVID-19 is enough of a risk for me</li> <li>6. I don't have time to attend a vaccine appointment</li> <li>7. I don't think the vaccine is safe</li> <li>8. Other reason</li> <li>9. Prefer not to say</li> </ol> |
| <p>C. Which of the following, if any, do you think would be most important in making COVID-19 public health messages effective?<br/><i>Please select up to three.</i></p>                                                                                                                                                 | <ol style="list-style-type: none"> <li>1. Easy to relate to</li> <li>2. Concise</li> <li>3. From a reliable source</li> <li>4. Timely</li> <li>5. Informative</li> <li>6. Memorable</li> <li>7. Achievable</li> <li>8. Accurate</li> <li>9. Eye-catching</li> <li>10. Encouraging</li> <li>11. None of the above</li> <li>12. Don't know</li> </ol>                                                                                                                                                                                                   |
| <p>D. In which of the following ways, if any, have you seen, heard, or received information about COVID-19?<br/>And which of these have been the main ways in which you have seen, heard or received information about COVID-19?<br/><i>Please select up to three.</i></p>                                                | <ol style="list-style-type: none"> <li>1. Government briefings/updates</li> <li>2. Mainstream news outlet online/in app</li> <li>3. Family</li> <li>4. Radio</li> <li>5. Friends</li> <li>6. Print media</li> <li>7. Medical professionals</li> <li>8. Posters or billboards</li> <li>9. From my employer</li> <li>10. Colleagues</li> <li>11. WhatsApp or other private messenger apps</li> <li>12. Other social media</li> <li>13. Facebook timeline</li> <li>14. Twitter timeline</li> </ol>                                                       |

|                                                                                                                                                                                                                                                                                                                                                                                                                                                                                                                                                                                                                                                                                                                                                                                                                                                                                                                                                                                                                                                                                                                                                                                                                    |                                                                                                                                                                                                                                                                                                                                                                                                      |
|--------------------------------------------------------------------------------------------------------------------------------------------------------------------------------------------------------------------------------------------------------------------------------------------------------------------------------------------------------------------------------------------------------------------------------------------------------------------------------------------------------------------------------------------------------------------------------------------------------------------------------------------------------------------------------------------------------------------------------------------------------------------------------------------------------------------------------------------------------------------------------------------------------------------------------------------------------------------------------------------------------------------------------------------------------------------------------------------------------------------------------------------------------------------------------------------------------------------|------------------------------------------------------------------------------------------------------------------------------------------------------------------------------------------------------------------------------------------------------------------------------------------------------------------------------------------------------------------------------------------------------|
|                                                                                                                                                                                                                                                                                                                                                                                                                                                                                                                                                                                                                                                                                                                                                                                                                                                                                                                                                                                                                                                                                                                                                                                                                    | <ol style="list-style-type: none"> <li>15. Community leaders/community groups</li> <li>16. Research papers in academic journals</li> <li>17. Professional/academic conferences</li> <li>18. Podcasts</li> <li>19. Messenger (previously Facebook Messenger)</li> <li>20. Charity communications</li> <li>21. Direct Message on Twitter</li> <li>22. None of these</li> <li>23. Don't know</li> </ol> |
| <p>E. How often, if at all, have you shared views, information, content, or feelings about COVID-19 in the following ways <u>online</u>?</p> <ul style="list-style-type: none"> <li>▪ Made comments in online forums</li> <li>▪ Made comments on online news sites</li> <li>▪ Made comments on social media</li> <li>▪ Shared links on social media or direct messaging <u>without commenting</u> (including WhatsApp)</li> <li>▪ Shared memes on social media or direct messaging <u>without commenting</u> (including WhatsApp)</li> <li>▪ Shared <u>and</u> commented on links on social media or direct messaging (including WhatsApp)</li> <li>▪ Shared <u>and</u> commented on memes on social media or direct messaging (including WhatsApp)</li> <li>▪ Exchanged direct messages online with people I personally know in real life (including via WhatsApp)</li> <li>▪ Exchanged direct messages online with people I know online</li> <li>▪ Exchanged direct messages online with strangers</li> <li>▪ Created my own original video content</li> <li>▪ Created my own original meme content</li> <li>▪ Created my own original commentary online (e.g., published blog post, wall post, etc.)</li> </ul> | <ol style="list-style-type: none"> <li>1. Never</li> <li>2. Rarely</li> <li>3. Occasionally/Sometimes</li> <li>4. Fairly often</li> <li>5. Very often</li> <li>6. Don't know</li> </ol>                                                                                                                                                                                                              |

## Appendix 2 – Message types considered and stimuli provided to respondents

| Message type                                            | Stimuli and variations                                                                                                                                                                                            |
|---------------------------------------------------------|-------------------------------------------------------------------------------------------------------------------------------------------------------------------------------------------------------------------|
| Personal responsibility and self-efficacy (modality)    | a) You <b>should</b> wear a face covering (over mouth and nose) if you are visiting a hospital.                                                                                                                   |
|                                                         | b) You <b>must</b> wear a face covering [...]                                                                                                                                                                     |
| Personal responsibility and self-efficacy (exclusivity) | a) Stopping the spread starts with <b>you</b> .                                                                                                                                                                   |
|                                                         | b) Stopping the spread starts with all of <b>us</b> .                                                                                                                                                             |
| Threat and fear appeals: modality                       | a) If you go out, you can spread it, people <b>will</b> die.                                                                                                                                                      |
|                                                         | b) If you go out, you can spread it, people <b>could</b> die.                                                                                                                                                     |
| Threat and fear appeals: proximity                      | a) Stay at home. For your <b>family</b> . For your <b>friends</b> .                                                                                                                                               |
|                                                         | b) Stay at home. For your <b>neighbours</b> . For our <b>NHS</b> .                                                                                                                                                |
| Threat and fear appeals: social consequences            | a) Stay home this bank holiday weekend. Don't put <b>your family and friends</b> in danger.                                                                                                                       |
|                                                         | b) [...] Don't put <b>yourself</b> in danger.                                                                                                                                                                     |
| Moralizing messages                                     | a) I wear this to protect you. Please wear yours to protect me. You <b>should</b> wear a face covering to keep your nose and mouth covered at all times on public transport, unless you have good reasons not to. |
|                                                         | b) [...] You <b>must</b> wear a face covering [...]                                                                                                                                                               |
| Framing (positive vs negative)                          | a) You <b>should</b> only be going shopping for essentials like food and medicine, and you should do this as infrequently as possible.                                                                            |
|                                                         | b) You <b>should not</b> be going shopping except for essentials [...]                                                                                                                                            |
| Grammatical mood (declarative vs imperative)            | a) Coronavirus. <b>Staying</b> at home <b>saves</b> lives.                                                                                                                                                        |
|                                                         | b) Coronavirus. <b>Stay</b> at home <b>save</b> lives.                                                                                                                                                            |

## Appendix 3 – Main collocates of ‘vaccine’ and ‘vaccinate’

| <b>Grammatical patterns with 'vaccine'</b> | <b>UK<br/>(439 hits; RF: 228.24)</b>                                                                                                   | <b>Scotland<br/>(733 hits; RF: 108.39)</b>                                                                                 | <b>Wales<br/>(472 hits; RF:149.05)</b>                                                                                                                    |
|--------------------------------------------|----------------------------------------------------------------------------------------------------------------------------------------|----------------------------------------------------------------------------------------------------------------------------|-----------------------------------------------------------------------------------------------------------------------------------------------------------|
| <i>modifiers of 'vaccine'</i>              | (98/22.3) (RF: 50.95)                                                                                                                  | (125/17.1) (RF: 18.48)                                                                                                     | (187/39.6) (RF: 59.05)                                                                                                                                    |
|                                            | <i>Total hits: 48 (RF: 24.95)</i>                                                                                                      | <i>Total hits: 60 (RF: 8.87)</i>                                                                                           | <i>Total hits: 91 (RF: 28.73)</i>                                                                                                                         |
| Vaccine brands / labs / types              | AstraZeneca (11/11.7); Oxford (8/11.1); Pfizer (7/11.1); BioNTech (6/10.9); Pfizer-BioNTech (4/10.3); Moderna (3/9.92); COVID (3/9.45) | Pfizer (18/12); AstraZeneca (8/10.9); Zeneca (5/10.3); Astra (5/10.3); Moderna (4/9.97); COVID-19 (6/9.94); Covid (8/9.42) | COVID-19 (28/11); AstraZeneca (11/10.8); Covid-19 (13/10.6); Pfizer (7/10.2); BioNTech (6/9.99); Oxford (5/9.69); Moderna (4/9.42)                        |
|                                            | <i>Total hits: 4 (RF: 2.07)</i>                                                                                                        | <i>Total hits: 19 (RF: 2.81)</i>                                                                                           | <i>Total hits: 47 (RF: 14.84)</i>                                                                                                                         |
| Vaccine doses                              | third (2/9.02); first (2/7.92)                                                                                                         | booster (7/9.89); first (10/8.71); third (2/8.14)                                                                          | booster (15/10.9; first (11/9.75); second (7/9.7); third (3/8.5); dose (2/8.41); additional (2/7.4)                                                       |
|                                            | <i>Total hits: 18 (RF: 9.35)</i>                                                                                                       | <i>Total hits: 9 (RF: 1.33)</i>                                                                                            | <i>Total hits: 12 (RF: 3.79)</i>                                                                                                                          |
| Evaluative qualifiers                      | successful (4/10.2); effective (4/10.1); different (4/9.86); tricky (2/9.35); new (4/8.05)                                             | effective (4/9.58); safe (2/8.24); new (3/6.23)                                                                            | effective (5/9.51); free (3/8.55); new (4/7.09)                                                                                                           |
| <i>nouns modified by 'vaccine'</i>         | (89/20.3) (RF: 46.27)                                                                                                                  | (134/18.3) (RF: 19.81)                                                                                                     | (94/19.9) (RF: 29.68)                                                                                                                                     |
|                                            | <i>Total hits: 35 (RF: 18.19)</i>                                                                                                      | <i>Total hits: 49 (RF: 7.24)</i>                                                                                           | <i>Total hits: 30 (RF: 9.43)</i>                                                                                                                          |
| Vaccination strategy                       | rollout (11/11.7); deployment (4/10.3); programme (10/10.3); plan (6/10.1); distribution (2/9.48); supply (2/9.19)                     | supply (13/11); programme (24/10.4); deployment (3/9.45); offer (3/9.38); delivery (3/9.17)                                | programme (15/10.2); offer (4/9.93); strategy (4/9.61); supply (3/9.55); rollout (2/9.34); roll (2/9.3); coverage (2/9.17)                                |
|                                            | <i>Total hits: 21 (RF: 10.91)</i>                                                                                                      | <i>Total hits: 6 (RF: 0.89)</i>                                                                                            |                                                                                                                                                           |
| Vaccine development/ studies               | development (6/10.8); Taskforce (5/10.7); candidate (4/10.4); advance (2/9.32); Force (2/9.23); testing (2/8.3)                        | trial (3/9.23); development (3/9.15)                                                                                       |                                                                                                                                                           |
|                                            | <i>Total hits: 2 (RF: 1.03)</i>                                                                                                        | <i>Total hits: 23 (RF: 3.40)</i>                                                                                           | <i>Total hits: 5 (RF: 1.58)</i>                                                                                                                           |
| Uptake                                     | uptake (2/9.42)                                                                                                                        | certification (12/11.1); certificate (13/11); hesitancy (2/8.91); uptake (2/8.65); appointment (2/8.46)                    | status (3/9.65); uptake (2/9.35)                                                                                                                          |
|                                            |                                                                                                                                        | <i>Total hits: 4 (RF: 0.59)</i>                                                                                            | <i>Total hits: 5 (RF: 1.58)</i>                                                                                                                           |
| Safety                                     |                                                                                                                                        | immunity (2/8.86); protection (2/8.08)                                                                                     | safety (3/9.67); protection (2/8.65)                                                                                                                      |
| <i>verbs with 'vaccine' as object</i>      | (108/24.6) (RF: 56.15)                                                                                                                 | (133/18.1) (RF: 19.66)                                                                                                     | (158/33.5) (RF: 49.89)                                                                                                                                    |
|                                            | <i>Total hits: 31 (RF: 16.12)</i>                                                                                                      | <i>Total hits: 30 (RF: 4.44)</i>                                                                                           | <i>Total hits: 55 (RF: 17.37)</i>                                                                                                                         |
| Vaccination strategy                       | deploy 86/10.6); offer (7/10.4); produce (4/10); deliver (4/9.34); roll (2/9.17); secure (2/8.9); make (4/8.42); provide (2/8.08)      | administer (9/10.8); deliver (10/10.4); offer (8/9.79); make (3/6.6)                                                       | administer (9/10.7); offer (14/10.4); transport (4/9.59); deliver (7/9.33); give (6/9.31); store (3/9.25); manufacture (3/9.18); procure (2/8.66); deploy |

|                                              |                                                                                                                   |                                                                                                                                                                                                                                                     |                                                                                                                                                                                           |
|----------------------------------------------|-------------------------------------------------------------------------------------------------------------------|-----------------------------------------------------------------------------------------------------------------------------------------------------------------------------------------------------------------------------------------------------|-------------------------------------------------------------------------------------------------------------------------------------------------------------------------------------------|
|                                              |                                                                                                                   |                                                                                                                                                                                                                                                     | (2/8.6); provide (3/6.87); make (2/6.8)                                                                                                                                                   |
| Vaccine development / studies                | <i>Total hits: 31 (RF: 16.12)</i>                                                                                 | <i>Total hits: 10 (RF: 1.48)</i>                                                                                                                                                                                                                    | <i>Total hits: 7 (RF: 2.21)</i>                                                                                                                                                           |
|                                              | develop (14/11.4); approve (9/11.3); find (6/10.4); authorise (2/9.19)                                            | approve (5/10.2); authorise (2/8.92); develop (3/8.8)                                                                                                                                                                                               | approve (4/9.56); authorise (3/9.23)                                                                                                                                                      |
| Uptake                                       | <i>Total hits: 13 (RF: 6.76)</i>                                                                                  | <i>Total hits: 21 (RF: 3.11)</i>                                                                                                                                                                                                                    | <i>Total hits: 39 (RF: 12.32)</i>                                                                                                                                                         |
|                                              | receive (3/9.21); get (8/9.19); take (2/7.12)                                                                     | receive (17/10); get (17/9.54); take (4/6.39)                                                                                                                                                                                                       | get (19/10.8); receive (10/9.78); take (8/8.68); request (2/8.6)                                                                                                                          |
| <b>verbs with 'vaccine' as subject</b>       | (111/25.3) (RF: 57.71)                                                                                            | (154/21) (RF: 22.77)                                                                                                                                                                                                                                | (106/22.5) (RF: 33.47)                                                                                                                                                                    |
| Safety                                       | <i>Total hits: 14 (RF: 7.28)</i>                                                                                  | <i>Total hits: 15 (RF: 2.22)</i>                                                                                                                                                                                                                    | <i>Total hits: 5 (RF: 1.58)</i>                                                                                                                                                           |
|                                              | save (3/9.64); reduce (2/9.14); secure (2/9.04); protect (2/9.02); help (2/8.79); work (3/8.71)                   | reduce (5/9.58); offer (4/9.48); work (5/8.73)                                                                                                                                                                                                      | offer (5/10)                                                                                                                                                                              |
| <b>Grammatical patterns with 'vaccinate'</b> | <b>UK</b><br>(73 hits) (RF: 37.95)                                                                                | <b>Scotland</b><br>(456 hits) (RF: 67.43)                                                                                                                                                                                                           | <b>Wales</b><br>(119 hits) (RF: 37.58)                                                                                                                                                    |
| <b>modifiers of 'vaccinate'</b>              | (16/21.9) (RF: 3.07)                                                                                              | (154/33.8) (RF: 22.77)                                                                                                                                                                                                                              | (33/27.7) (RF: 10.42)                                                                                                                                                                     |
| temporal references                          | <i>Total hits: 12 (RF: 6.24)</i>                                                                                  | <i>Total hits: 51 (RF: 7.54)</i>                                                                                                                                                                                                                    | <i>Total hits: 4 (RF: 1.26)</i>                                                                                                                                                           |
|                                              | first (1/9.27), now (10/8.55), currently (1/8.44)                                                                 | soon (11/10.4); quickly (8/9.37); yet (6/8.3); first (3/8.29); only (3/7.73); then (2/7.24), now (12/7.23), just (2/5.79)                                                                                                                           | once (1/8.65), yet (1/8.4), already (1/6.24), now (1/6.21)                                                                                                                                |
| vaccination references                       | <i>Total hits: 1 (RF: 0.52)</i>                                                                                   | <i>Total hits: 95 (RF: 14.05)</i>                                                                                                                                                                                                                   | <i>Total hits: 25 (RF: 8.84)</i>                                                                                                                                                          |
|                                              | once (1/8.68)                                                                                                     | fully (85/12.7); double (10/10.9)                                                                                                                                                                                                                   | fully (25/12.5)                                                                                                                                                                           |
| <b>objects of 'vaccinate'</b>                | (15/20.5) (RF: 7.79)                                                                                              | (132/28.9) (RF: 19.52)                                                                                                                                                                                                                              | (53/44.5) (RF: 16.74)                                                                                                                                                                     |
| references to people                         | <i>Total hits: 15 (RF: 7.79)</i>                                                                                  | <i>Total hits: 88 (RF: 13.01)</i>                                                                                                                                                                                                                   | <i>Total hits: 33 (RF: 10.42)</i>                                                                                                                                                         |
|                                              | someone (2/11.1), fifth (1/11), 80 (1/11) group (2/10.7), population (1/10.5), resident (1/10.1), people (7/9.04) | population (14/11.6), traveller (6/10.4), resident (6/10.2), people (35/9.82), rest (3/9.45), everybody (5/9.32), someone (3/9.09), teenager (2/8.92), group (3/8.87), individual (3/8.87), proportion (2/8.72), everyone (3/7.89), number (3/6.77) | population (4/11.1), people (18/9.62), child (3/9.5), group (2/9.34), 39-year-olds (1/9.24), passenger (1/9.12), patient (1/8.33), anyone (1/8.23), community (1/7.52), everyone (1/7.15) |
| qualifiers of people                         |                                                                                                                   | <i>Total hits: 6 (RF: 0.89)</i>                                                                                                                                                                                                                     | <i>Total hits: 3 (RF: 0.94)</i>                                                                                                                                                           |
|                                              |                                                                                                                   | old (3/9.46), adult (3/3.34)                                                                                                                                                                                                                        | adult (3/10.4)                                                                                                                                                                            |

#### Appendix 4 – Responses to “Have you received a COVID-19 vaccine?” by demographic

Have you received a COVID-19 vaccine? Base: All adults aged 16-75 in Great Britain. 1-3 March 2022.

|                       |                          | Unweighted base | Yes - 1 dose | Yes - 2 doses | Yes - 3 doses | No - I have been offered the COVID-19 vaccine, but I have not had it | No - I have not received a COVID-19 vaccine nor been invited to have one | Prefer not to say |
|-----------------------|--------------------------|-----------------|--------------|---------------|---------------|----------------------------------------------------------------------|--------------------------------------------------------------------------|-------------------|
| <b>Social grade</b>   | AB                       | 490             | 2%           | 14%           | 74%           | 5%                                                                   | 4%                                                                       | 1%                |
|                       | C1                       | 321             | 2%           | 12%           | 77%           | 5%                                                                   | 2%                                                                       | 2%                |
|                       | C2                       | 101             | 1%           | 19%           | 62%           | 11%                                                                  | 6%                                                                       | 1%                |
|                       | DE                       | 177             | 5%           | 15%           | 54%           | 12%                                                                  | 1%                                                                       | 2%                |
| <b>Age</b>            | 16-24                    | 160             | 6%           | 28%           | 29%           | 18%                                                                  | 15%                                                                      | 4%                |
|                       | 25-34                    | 202             | 4%           | 19%           | 52%           | 14%                                                                  | 10%                                                                      | 2%                |
|                       | 35-44                    | 192             | 3%           | 19%           | 66%           | 6%                                                                   | 4%                                                                       | 2%                |
|                       | 45-54                    | 210             | 1%           | 10%           | 81%           | 5%                                                                   | 2%                                                                       | *                 |
|                       | 55-75                    | 325             | 1%           | 6%            | 89%           | 2%                                                                   | 1%                                                                       | 1%                |
| <b>Household size</b> | 1                        | 219             | 1%           | 12%           | 73%           | 10%                                                                  | 5%                                                                       | -                 |
|                       | 2                        | 370             | 2%           | 9%            | 80%           | 5%                                                                   | 2%                                                                       | 1%                |
|                       | 3                        | 218             | 4%           | 18%           | 56%           | 7%                                                                   | 13%                                                                      | 1%                |
|                       | 4+                       | 282             | 3%           | 24%           | 56%           | 10%                                                                  | 4%                                                                       | 3%                |
| <b>Income</b>         | up to £19,999            | 238             | 4%           | 14%           | 62%           | 10%                                                                  | 9%                                                                       | 1%                |
|                       | £20,000-£34,999          | 262             | 3%           | 15%           | 69%           | 8%                                                                   | 3%                                                                       | 2%                |
|                       | £35,000 - £54,999        | 265             | 2%           | 18%           | 67%           | 8%                                                                   | 4%                                                                       | 1%                |
|                       | £55,000+                 | 242             | 1%           | 14%           | 76%           | 5%                                                                   | 4%                                                                       | 1%                |
|                       | Prefer not to say        | 82              | 1%           | 9%            | 73%           | 4%                                                                   | 8%                                                                       | 5%                |
| <b>Education</b>      | GCSE/O Level/NV Q12      | 249             | 4%           | 17%           | 61%           | 9%                                                                   | 7%                                                                       | 3%                |
|                       | A Level or equivalent    | 229             | 2%           | 18%           | 62%           | 11%                                                                  | 5%                                                                       | 2%                |
|                       | Degree/Masters/PhD       | 565             | 1%           | 12%           | 77%           | 5%                                                                   | 4%                                                                       | 1%                |
|                       | No formal qualifications | 46              | 8%           | 13%           | 55%           | 10%                                                                  | 11%                                                                      | 3%                |

### Appendix 5 – Motivations for vaccine refusal

Which of the following best describes why you have only had one dose of/ only had two doses of/ not yet had the COVID-19 vaccine? Base: 258 Adults who have not had the vaccine despite having been invited, or who have had 2 or fewer doses. 1-3 March 2022.

|                       |                       | Unweighted base | I am worried about side effects of the vaccine | I am medically exempt | I don't trust the intentions behind wanting to vaccinate the public against COVID-19 | I don't think the vaccine is effective / don't think it works | I don't think COVID-19 is enough of a risk for me | I don't have time to attend a vaccine appointment | I don't think the vaccine is safe | Other reasons | Prefer not to say |
|-----------------------|-----------------------|-----------------|------------------------------------------------|-----------------------|--------------------------------------------------------------------------------------|---------------------------------------------------------------|---------------------------------------------------|---------------------------------------------------|-----------------------------------|---------------|-------------------|
| <b>Social grade</b>   | AB                    | 109             | 31%                                            | 9%                    | 16%                                                                                  | 25%                                                           | 18%                                               | 10%                                               | 14%                               | 25%           | 3%                |
|                       | C1                    | 61              | 33%                                            | 2%                    | 18%                                                                                  | 19%                                                           | 27%                                               | 11%                                               | 8%                                | 27%           | 3%                |
|                       | C2                    | 31              | 23%                                            | 2%                    | 29%                                                                                  | 28%                                                           | 50%                                               | 11%                                               | 17%                               | 19%           | 3%                |
|                       | DE                    | 57              | 31%                                            | 10%                   | 15%                                                                                  | 25%                                                           | 21%                                               | 18%                                               | 17%                               | 15%           | 7%                |
| <b>Age</b>            | 16-24                 | 81              | 17%                                            | 9%                    | 13%                                                                                  | 24%                                                           | 34%                                               | 17%                                               | 15%                               | 14%           | 4%                |
|                       | 25-34                 | 71              | 32%                                            | 5%                    | 20%                                                                                  | 18%                                                           | 23%                                               | 15%                                               | 8%                                | 22%           | 3%                |
|                       | 35-44                 | 48              | 45%                                            | 5%                    | 24%                                                                                  | 29%                                                           | 28%                                               | 13%                                               | 20%                               | 15%           | 7%                |
|                       | 45-54                 | 37              | 21%                                            | 6%                    | 19%                                                                                  | 28%                                                           | 25%                                               | 10%                                               | 10%                               | 26%           | 4%                |
|                       | 55-75                 | 21              | 40%                                            | -                     | 29%                                                                                  | 30%                                                           | 41%                                               | -                                                 | 33%                               | 42%           | 2%                |
| <b>Household size</b> | 1                     | 38              | 43%                                            | 4%                    | 27%                                                                                  | 34%                                                           | 41%                                               | 5%                                                | 28%                               | 20%           | 2%                |
|                       | 2                     | 56              | 28%                                            | 1%                    | 19%                                                                                  | 30%                                                           | 24%                                               | 9%                                                | 11%                               | 15%           | 3%                |
|                       | 3                     | 64              | 28%                                            | 5%                    | 15%                                                                                  | 17%                                                           | 26%                                               | 18%                                               | 14%                               | 23%           | 2%                |
|                       | 4+                    | 100             | 23%                                            | 10%                   | 19%                                                                                  | 20%                                                           | 28%                                               | 17%                                               | 12%                               | 24%           | 7%                |
| <b>Income</b>         | up to £19,999         | 70              | 37%                                            | 7%                    | 26%                                                                                  | 26%                                                           | 35%                                               | 15%                                               | 19%                               | 13%           | 5%                |
|                       | £20,000-£34,999       | 63              | 33%                                            | 1%                    | 21%                                                                                  | 27%                                                           | 27%                                               | 12%                                               | 15%                               | 25%           | 3%                |
|                       | £35,000-£54,999       | 66              | 21%                                            | 4%                    | 14%                                                                                  | 24%                                                           | 32%                                               | 11%                                               | 15%                               | 28%           | 5%                |
|                       | £55,000+              | 50              | 19%                                            | 11%                   | 18%                                                                                  | 18%                                                           | 17%                                               | 16%                                               | 7%                                | 14%           | 5%                |
|                       | Prefer not to say     | 9               | 33%                                            | 23%                   | 11%                                                                                  | 20%                                                           | 29%                                               | 9%                                                | 11%                               | 37%           | -                 |
| <b>Education</b>      | GCSE/ O Level/ NVQ1   | 74              | 21%                                            | 5%                    | 17%                                                                                  | 17%                                                           | 27%                                               | 11%                                               | 18%                               | 32%           | 5%                |
|                       | A Level or equivalent | 70              | 30%                                            | 6%                    | 11%                                                                                  | 23%                                                           | 35%                                               | 11%                                               | 16%                               | 18%           | 3%                |

|                                 |    |     |    |     |     |     |     |     |     |    |
|---------------------------------|----|-----|----|-----|-----|-----|-----|-----|-----|----|
| <i>Degree / Master s/PhD</i>    | 99 | 40% | 6% | 30% | 31% | 29% | 16% | 15% | 14% | 3% |
| <i>No formal qualifications</i> | 15 | 12% | 7% | 17% | 32% | 19% | 10% | 4%  | 18% | 6% |
